# Supplementary material
Source: PubMed Central journal article supplement (PMC3199392)

Figure 1 C

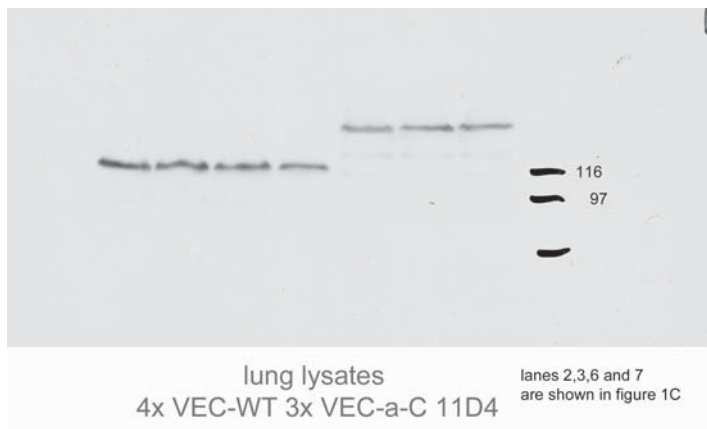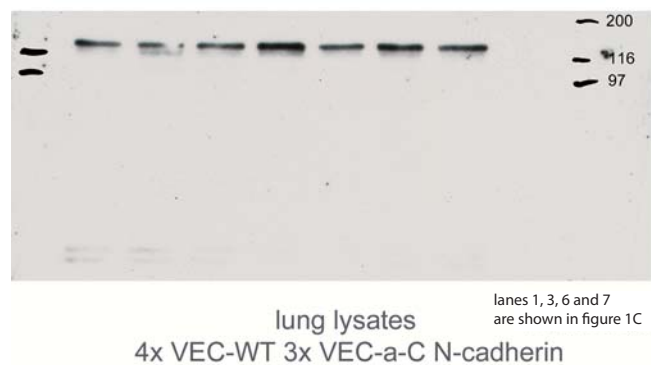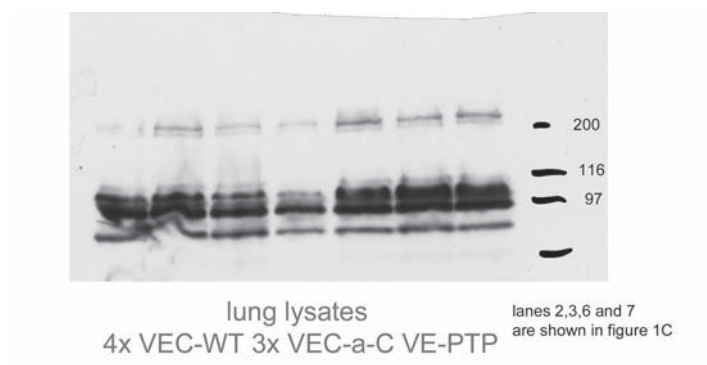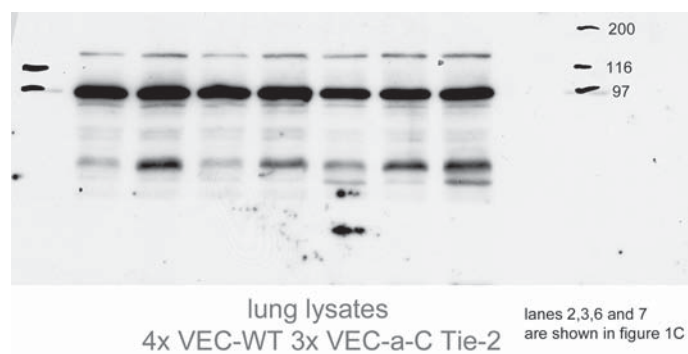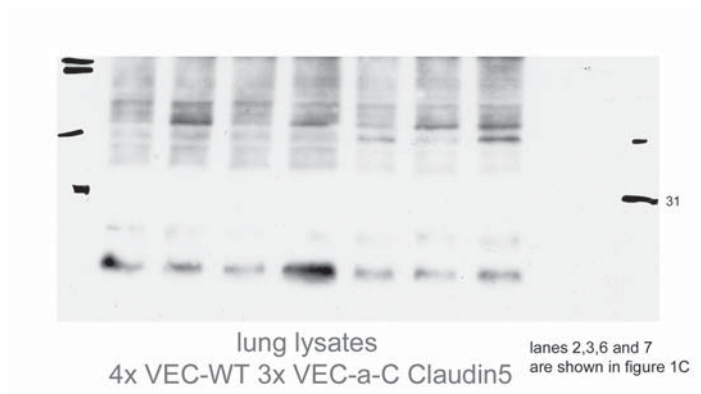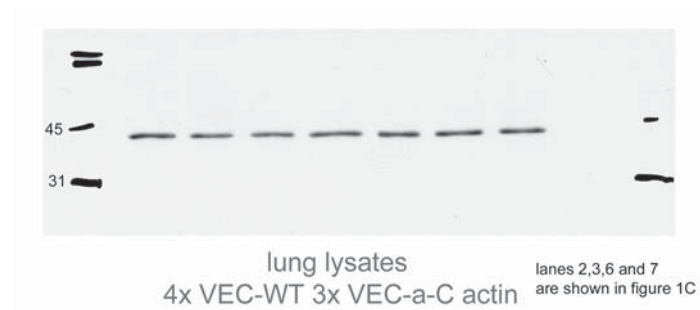

Figure 6

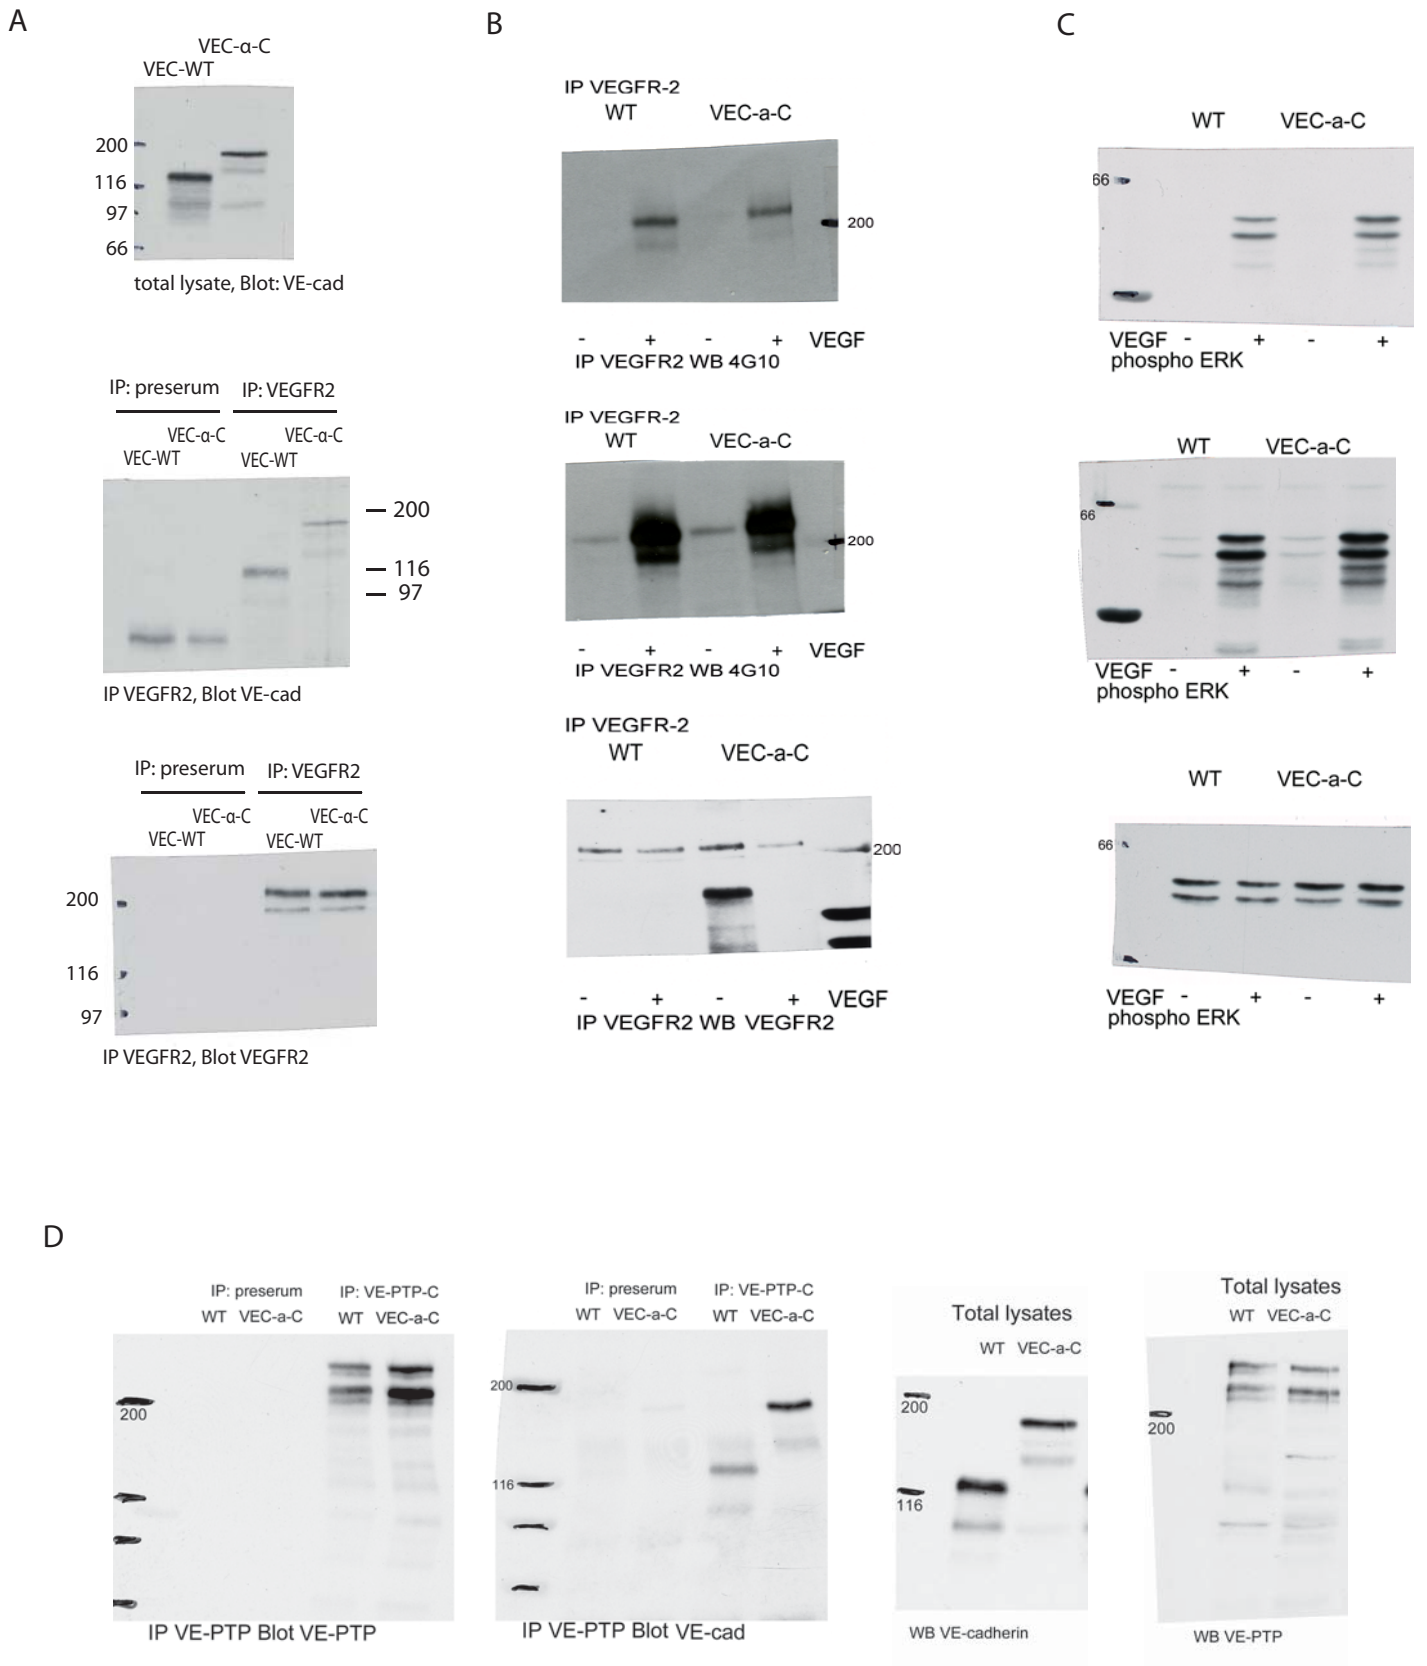

Figure 6 E

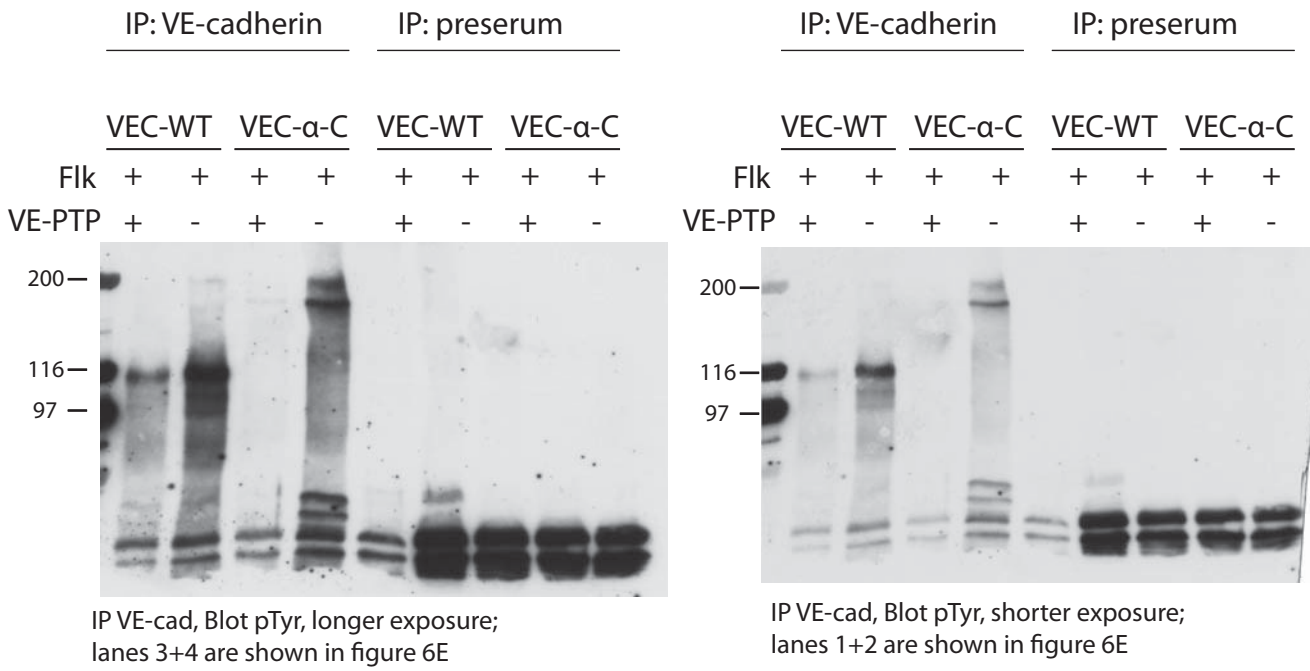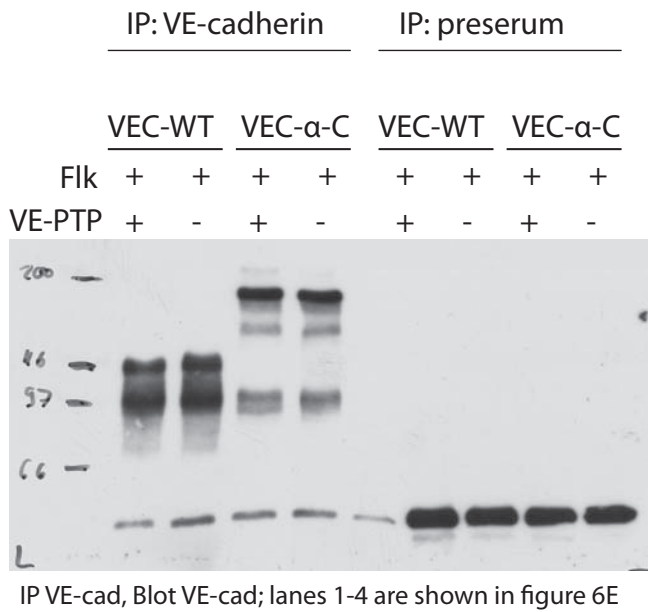

Figure 7 A total detergent lysates

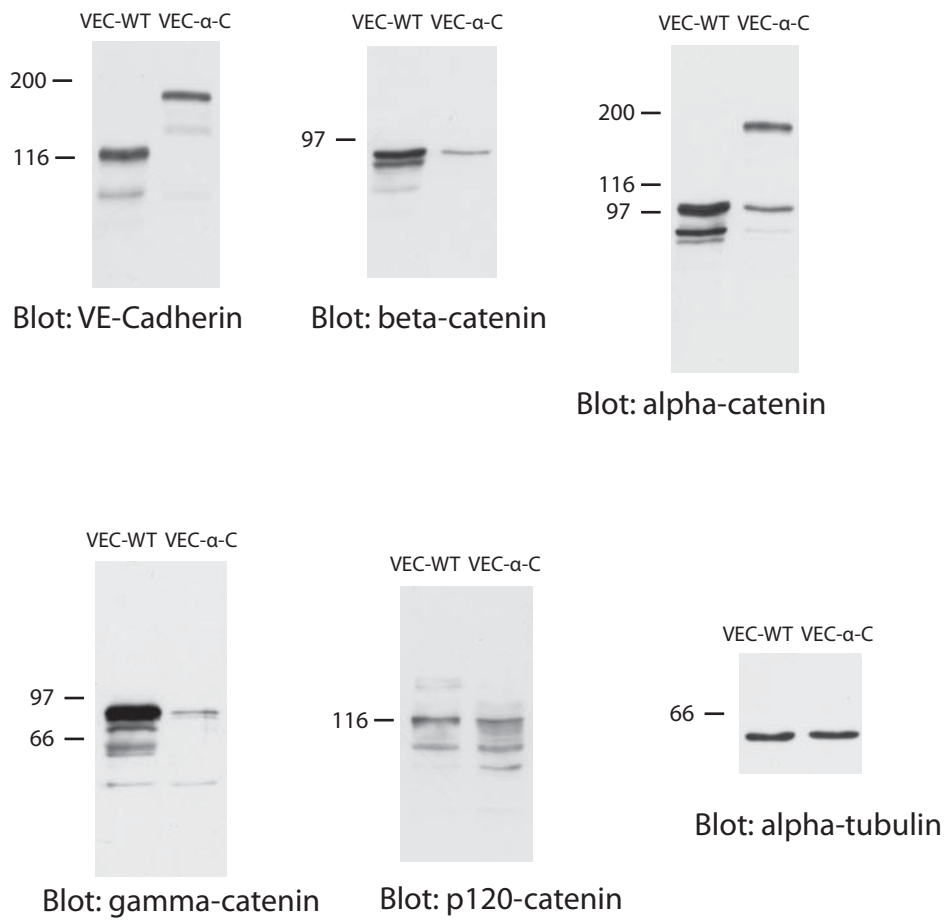

Figure 8

B

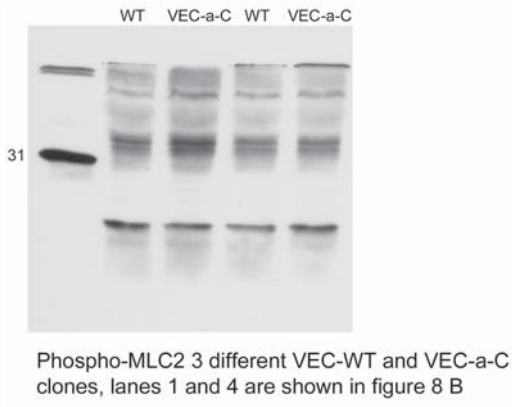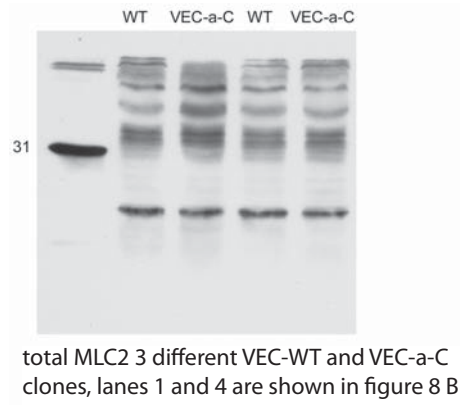

C

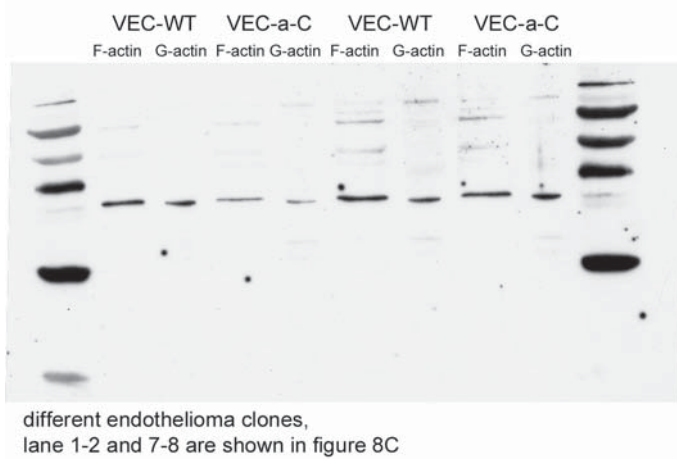

D

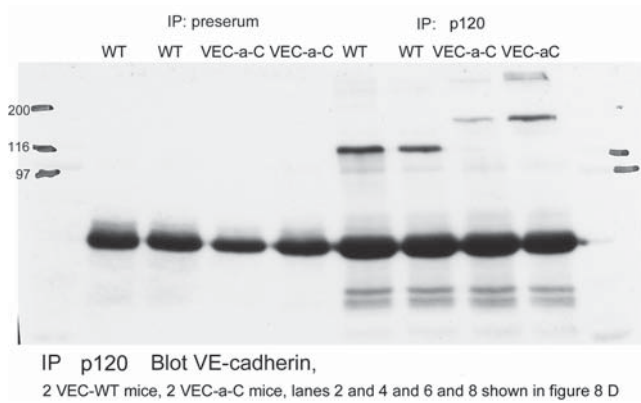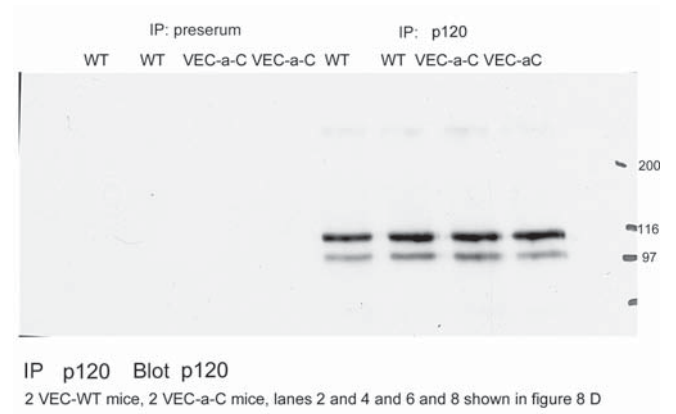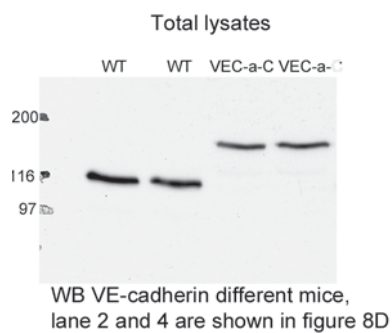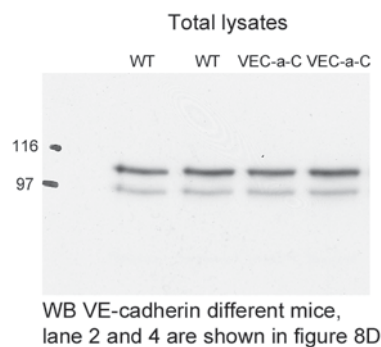

Figure 9

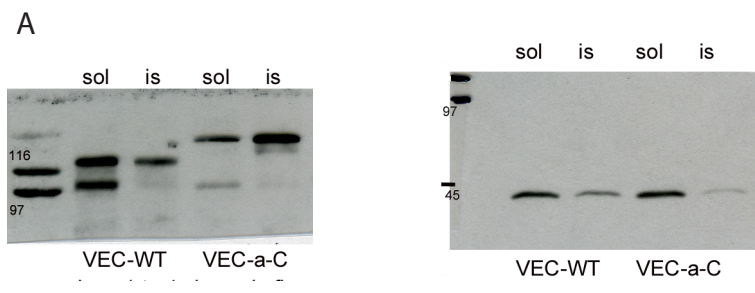

Supplement: emboj2011304s2.pdf [file emboj2011304s2.pdf]
